# Supplementary material
Source: PubMed Central journal article supplement (PMC3214236)
Supplement: 10162_2011_286_MOESM1_ESM.pdf [file 10162_2011_286_MOESM1_ESM.pdf]

**Supplemental Table 1: Oligonucleotide primer pairs used for RT-PCR.**

| <b>Gene symbol</b>                | <b>Forward primer (5'-&gt;3')</b> | <b>Reverse primer (5'-&gt;3')</b> | <b>PCR product size (bp)</b> |
|-----------------------------------|-----------------------------------|-----------------------------------|------------------------------|
| <b>Housekeeping genes</b>         |                                   |                                   |                              |
| GAPDH                             | ACGCCATCACTATCTTCCAG              | CCTTCACTACCCTCTTG                 | 578                          |
| <b>Transcriptional regulators</b> |                                   |                                   |                              |
| AATF                              | CGTTTCGTTGGCTGCGGATCT             | ACCCACAAACCCACGCGA                | 451                          |
| ADNP                              | GTCTCCTGCTGGCCTCTCACTCC           | TCAGCAGCTGGTGCACATCCAAC           | 337                          |
| ASCC1                             | CCACCTGACTCTGGGGACGC              | CCGCTGTGCCGTAGTACCCG              | 518                          |
| CASKIN1                           | CGTGCAAGCCGTTCTGTTCGG             | CTGCGCGGCTCGGGAAGAG               | 373                          |
| CHURC1                            | CTACGACCACCTGTGCAAG               | ACCTTTATTGCTCACGCTCC              | 299                          |
| CIR                               | CCGCCGCCATGGGGAAGTC               | ACGTTCCGCACCTGGATGCC              | 379                          |
| CTCF                              | TGGAGGAAGACCACGCCGGAT             | GGCCGTCCGAGGACCCTGTT              | 308                          |
| E2F4                              | CAGCACCAGCAGTGACGGGG              | TGGAGGGAGCGAAGGTCGGG              | 351                          |
| E2F5                              | GCCTCAGGCCTCTTCCATGAGCT           | TGCAGATGAGCTGGGCACGTT             | 435                          |
| FOXM1                             | AGAACAGCAGTGGCGAGGCAA             | TTGACCCAAAGTCCAGCGGCT             | 510                          |
| HLF                               | GAGCTCTGGGAGCGCAGCAC              | GACTCCCCTGCCCTCTGCCA              | 441                          |
| HSF2                              | AGCTCCGTGCAGATGAATCCCACA          | CCAACCGTGTCTAACAGCTTGCC           | 598                          |
| JARID1B                           | AGCGGCGGAGTTTTCCACGG              | GAAAGGGGGCTGCGTGGGAC              | 314                          |
| LBH                               | GCTGGTCAGTGGGCTTGCGA              | ACAGACCGCTCCCCACTGGAG             | 309                          |
| MAFF                              | GGCGCCTTCCCCTACGTACC              | TGCTGACCCCGTTCACCCTCA             | 404                          |
| MED14                             | GCGGATCATTCTTGGCTCCAGC            | TGGATCACCAGACAACCTGCGCT           | 400                          |
| MED16                             | TTTGGCGTACGTGTGCGAGTGG            | GCCAGGTGGTCGGTCATGCTC             | 306                          |
| MED24                             | CCTGGAACGCCGTGGAGCAAT             | GAGGCCACGAAACACGCCTT              | 317                          |
| MYST4                             | TCCCCGGCTGACAAAGCCACAG            | CCGCCATTTAGATGGACCGCG             | 460                          |
| NPM1                              | GCAAGTGGAGGAGGAGCTAA              | AACAGGCATTTTGGACAACAC             | 609                          |
| NRARP                             | AAGCTGCTCGTCAAGTTCGGCG            | ACCCTCGGAAGGAAAACCTAACCG          | 276                          |
| PAX2                              | ACCATGCCAGACTGAGAACC              | GCGTGGGGAGTAACAGAAAAG             | 380                          |
| PHB2                              | GCTGGCTCCCAAACCGTGTG              | TGCTGATGGCAGCAGAACTCCC            | 499                          |
| PSMD9                             | TGTGACTGTGATCCGCAACGGC            | GTTGCTCCCCACAAACAGTGCA            | 311                          |
| RFX2                              | TCCCCACTGAACCGCTTGCA              | GTGTAAGTGTGCTGGGCACCGG            | 586                          |
| SAP30BP                           | CCCTCGAACGTGCCAGCTCAG             | TGTGCACTCTGGGATACGTCCG            | 413                          |
| SNAPC5                            | GCGGACACCAAGTGGAGCAGT             | TGTGAGTCTCAGGAAGGCTTTGCC          | 530                          |
| SOX2                              | ACTCGGCCGCAACAACCAG               | GTTGTGCGCGTTCAAGCCCG              | 488                          |
| SOX4                              | CGCCCTCCGGATGCGAAAGAG             | AGCGCCATCTGTCCGCTTCG              | 314                          |
| SOX7                              | GGCCGAGCACACCAGCAGAG              | TGGGCACTGCGGCTCGAAAC              | 390                          |

|                               |                         |                        |     |
|-------------------------------|-------------------------|------------------------|-----|
| SOX8                          | CCCCAGCCACTACAGCGACC    | GGGACACCCAGTCGCAACG    | 471 |
| SOX10                         | CCCGCACCAGCCAGCAATTGA   | GGGTGCCCATCGGACATGGG   | 699 |
| SOX11                         | CCCGACTACTGCACCCCGG     | CCGCCAAGCTTCGAACAGCG   | 361 |
| SOX18                         | CTCAGAGCGGGCTTTCCGCC    | CGCGAGCCTAGCCGGTGATG   | 300 |
| TAF1                          | ATGCAGGTCGGCATGGCAACA   | GCCGCTTTCCGATGCTGCTCT  | 463 |
| TBL1XR1                       | GCTGGAGGTCCATGACTGTGGC  | AGCAGGAGCAGCACTGTGGC   | 644 |
| TGIF2                         | CACCCACGGGGCCCCTTTTC    | CTGGCCGACACAGGGCACTC   | 492 |
| TGS1                          | TCCAGACACCAAGGAGGAGTGGG | GCGCTGCTCTGCTCCGATGT   | 336 |
| TMF1                          | TCAAGCAAGTCTCCAGTGGCTGC | ACCCCTCGAAGTGGAGGCAACA | 300 |
| TP53                          | GTGTGCGCATGTCCGGGGAG    | CTTCCCGCAGCTGGGTTGGG   | 300 |
| VEZF1                         | ACGAGTCCTGCCACACGGGG    | GTGGGACAGCTTGTGCCGGTT  | 314 |
| ZFPM1                         | ACCCAACCCAGTCCGCAACAG   | TGGAGCACGCCGGGTTCTT    | 445 |
| ZNF326                        | AAACCCAGCCCTGCAGCAGTT   | TCTGGCCTCAATTCGCCGCT   | 321 |
| <b>Transmembrane proteins</b> |                         |                        |     |
| CLDN1                         | CAGCCAACCTCCGCAGGTGC    | ACCCAGGAGTATGGCGGCCA   | 312 |
| FGFR1                         | CACCACCGCAGGGAAGTCC     | CCACCAGCACCTCCCTACCCAG | 353 |
| IGF1R                         | TCTCGGCCCTCCGTCGTTGT    | CGGGAAGCGGAAGTTGCGGT   | 369 |
| ITGB1                         | CCTAACAGCCCTGCCTGCCAC   | AGTGAGACAGCGGATCGGGCT  | 658 |
| ITGB5                         | TCACCATCAAGCCAGCCGGC    | ACACTCGCAGAAGGGCCCGT   | 326 |
| PLXNA1                        | GGCTCAAGCACCCCTTGCCG    | GGCGATCAGTCGGTTCCCGG   | 359 |
| PRTG                          | GCTGCGGCCTGACAGTGTCT    | GGCACCATGCGATCACGGACA  | 420 |
| PTK7                          | GAGCCGTACTCGCAGGACGC    | GCCGTCGATGTGACACCGCA   | 354 |
| SEMA5B                        | ACTACAGGCCCGAGGCCTCC    | TACTGCTGCGTGGTGGCACG   | 369 |
| SMO                           | TGGTGGCAGTGGGGTGACGA    | CTCAGGTGCGCTCAGACGGC   | 590 |
| TACSTD1                       | GGTGTGTGAACACGGCTGGTGT  | CCATGCCTCCCGTGTTCCGTC  | 654 |
| <b>Growth factors</b>         |                         |                        |     |
| HDGF                          | GGGACCCATGAAACGGC       | CATCTCCTTGGTGCCCTTGG   | 362 |
| MDK                           | CTGCCAAAGCCAAGAAAGAG    | CTAGTCCTTCCCCTTGCCC    | 368 |
