# Supplementary material
Source: PubMed Central journal article supplement (PMC3214236)
Supplement: 10162_2011_286_MOESM3_ESM.pdf [file 10162_2011_286_MOESM3_ESM.pdf]

**Supplemental Table 3: Ambiguous tags.**

| Tag sequence       | Tag count | Gene symbol 1 | Other gene symbols     |
|--------------------|-----------|---------------|------------------------|
| AGCTCCCCGTGCCACAT  | 35        | RPL17         | TLX3                   |
| GCGGCGGCGGCGGCGGC  | 12        | OTP           | PEX16 SARS, TBX3, WDR3 |
| AAGCTGGATGAGGGGAA  | 9         | EIF3D         | FOXRED2                |
| CCACTAATGGAGAAAGG  | 8         | B-LA          | SUMO1                  |
| AAGAAGGGAGAGGAAAC  | 4         | CCDC104       | SMEK2                  |
| GCCGTGCTGGAGCCCCT  | 4         | QARS          | QRICH1                 |
| TCACCTGCGGAAACCCT  | 4         | TUBA5         | TUBA7                  |
| TTGATGCACAAAGGCCA  | 4         | ABI1          | SREBF2                 |
| CTGGCTCCCTTCTCCC   | 3         | SRRD          | TFIP11                 |
| GAGACGTCGGCCAAGAC  | 3         | HBA2          | RAP2C                  |
| GCTCTGTTGTACTACTGG | 3         | PSMD7         | WWP2                   |
| GTAAAATAGGGAGCCC   | 3         | CCDC13        | HIGD1A                 |
| GTAAATTACTTTTGACT  | 3         | MED31         | TXNDC17                |
| GTTGAAGTCAATCCACT  | 3         | ARG2          | VTI1B                  |
| AAAGTATGGATTCTCCC  | 2         | DNAJC17       | OR8U1                  |
| ACTCAGCCTTCCCTCTC  | 2         | ASB3          | NPHP1                  |
| CTGAGTGTGGAGCGGGG  | 2         | ATP5L         | UBE4A                  |
| TTTGCAACTGCTTTGGA  | 2         | E2F4          | TMEM208                |
| AAACTGTACAGACATTC  | 1         | PDHB          | PXK                    |
| AGCTGCCTGGCAGAGGC  | 1         | AAMP          | ARPC2                  |
| CACACTGATGTCCTGGN  | 1         | SRR           | TSR1                   |
| CCATTAGCAGTGCCTGT  | 1         | AGPAT2        | EGFL7                  |
| CCTGTGAGACAGCCGAG  | 1         | GON4L         | MSTO1                  |
| CTGCTGCTGCTCCTGCT  | 1         | VEZF1         | ZBTB20                 |
| CTTGCAACTGCTTTGGA  | 1         | E2F4          | TMEM208                |
| GAAACATACAACAGACC  | 1         | CBLB          | DOCK5                  |
| GAAGCAAAGAACAGGGG  | 1         | C1ORF26       | IVNS1ABP               |
| GACTTGGCCATCAAACC  | 1         | ATAD1         | PAPSS2                 |
| GAGAGCAACAAAAGCCT  | 1         | ATP6V1C2      | PDIA6                  |
| GAGGACTACTTCGCCTA  | 1         | BRG1          | SMARCA4                |
| GCACAGAGCGACCCCCC  | 1         | NPEPPS        | SPCS2                  |
| GCACGNGTCGAGCTGTT  | 1         | PRPS1         | SMEK2                  |
| GCCCCAGTGCCAGGG    | 1         | NUP210L       | TPM3                   |
| GCCCTGCTCCAGCGCCA  | 1         | SRRD          | TFIP11                 |
| GCGGCGGCGGCGGCGAC  | 1         | SETD7         | SPAST                  |
| GGAGATGGTGAGAAATC  | 1         | GPR89A        | PDZK1                  |
| GGATGACCAGTGCAAAG  | 1         | GTF3A         | MTIF3                  |
| GGCTCAGAGGCAGGTCT  | 1         | CBFA2T3       | PABPN1                 |
| GGCTGAAAAGAGAGGAA  | 1         | MRPL33        | RBKS                   |

|                   |   |          |         |
|-------------------|---|----------|---------|
| GGCTTTCAGACCCTTGG | 1 | CCDC13   | HIGD1A  |
| GTATTGGAGTATGAGAA | 1 | ATP6V0C  | TBC1D24 |
| GTTGCAGACAAAAGAG  | 1 | SAV1     | SPG3A   |
| GTTTTGTCAGTTGATAC | 1 | ISCA1    | ZCCHC6  |
| TAATAAAGCGTGTGAT  | 1 | GRSF1    | RUFY3   |
| TAGAGTGTTTTGATACT | 1 | NUP210L  | TPM3    |
| TATAACAACGTTTTCT  | 1 | ATP1B3   | FKBP3   |
| TATCTGAGCAACCACAC | 1 | ATG4A    | COL4A6  |
| TCCCCCCTTTGGTGGA  | 1 | HMX1     | SYNJ1   |
| TCGAGTGTTCTGATACT | 1 | NUP210L  | TPM3    |
| TCGAGTGTTTNGATACT | 1 | NUP210L  | TPM3    |
| TCTTGTGTATCAGTGTC | 1 | ATP6V1C2 | PDIA6   |
| TGCAAATGTGCCTTGAA | 1 | GRSF1    | RUFY3   |
| TTAGCCCCAAAGTGCCT | 1 | ATG4A    | COL4A6  |
