# Supplementary material
Source: PubMed Central journal article supplement (PMC3214236)
Supplement: 10162_2011_286_MOESM6_ESM.pdf [file 10162_2011_286_MOESM6_ESM.pdf]

**Supplemental Table 6:** Secreted proteins identified in the annotated chicken otocyst SAGE library. Listed are the gene symbols, gene names, and tag count.

| Gene symbol | Gene name                                                                              | Tag count |
|-------------|----------------------------------------------------------------------------------------|-----------|
| MDK         | midkine (neurite growth-promoting factor 2)                                            | 154       |
| COL2A1      | collagen, type II, alpha 1                                                             | 39        |
| COL18A1     | collagen, type XVIII, alpha 1                                                          | 31        |
| LAMC1       | laminin, gamma 1 (formerly LAMB2)                                                      | 21        |
| HDGF        | hepatoma-derived growth factor (high-mobility group protein 1-like)                    | 16        |
| SEMA3B      | sema domain, immunoglobulin domain (Ig), short basic domain, secreted, (semaphorin) 3B | 15        |
| UTS2D       | urotensin 2 domain containing                                                          | 14        |
| SPARC       | secreted protein, acidic, cysteine-rich (osteonectin)                                  | 12        |
| WDR73       | WD repeat domain 73                                                                    | 11        |
| COL11A1     | collagen, type XI, alpha 1                                                             | 10        |
| GPI         | glucose phosphate isomerase                                                            | 10        |
| IGHM        | immunoglobulin heavy constant mu                                                       | 9         |
| OLFML3      | olfactomedin-like 3                                                                    | 9         |
| SDF2        | stromal cell-derived factor 2                                                          | 9         |
| SFRP2       | secreted frizzled-related protein 2                                                    | 9         |
| AAMP        | angio-associated, migratory cell protein                                               | 7         |
| IGFBP4      | insulin-like growth factor binding protein 4                                           | 7         |
| NID2        | nidogen 2 (osteonidogen)                                                               | 7         |
| RARRES2     | retinoic acid receptor responder (tazarotene induced) 2                                | 7         |
| ARMET       | arginine-rich, mutated in early stage tumors                                           | 6         |
| COL5A1      | collagen, type V, alpha 1                                                              | 6         |
| KIAA0100    | KIAA0100                                                                               | 6         |
| NOTUM       | notum pectinacetylerase homolog (Drosophila)                                           | 6         |
| WFDC1       | WAP four-disulfide core domain 1                                                       | 6         |
| APOA1BP     | apolipoprotein A-I binding protein                                                     | 5         |
| COL1A2      | collagen, type I, alpha 2                                                              | 5         |
| COL4A6      | collagen, type IV, alpha 6                                                             | 5         |
| LAMA1       | laminin, alpha 1                                                                       | 5         |
| LAMB1       | laminin, beta 1                                                                        | 5         |
| MMP17       | matrix metalloproteinase 17 (membrane-inserted)                                        | 5         |
| NCAN        | neurocan                                                                               | 5         |
| PSAP        | prosaposin                                                                             | 5         |
| SERPING1    | serpin peptidase inhibitor, clade G (C1 inhibitor), member 1                           | 5         |
| ANXA2       | annexin A2                                                                             | 4         |
| C10ORF58    | chromosome 10 open reading frame 58                                                    | 4         |
| C17ORF71    | chromosome 17 open reading frame 71                                                    | 4         |
| GIP         | gastric inhibitory polypeptide                                                         | 4         |

|           |                                                                    |   |
|-----------|--------------------------------------------------------------------|---|
| GPX3      | glutathione peroxidase 3 (plasma)                                  | 4 |
| IK        | IK cytokine, down-regulator of HLA II                              | 4 |
| TFIP11    | tuftelin interacting protein 11                                    | 4 |
| TXLNA     | taxilin alpha                                                      | 4 |
| AGRN      | agrin                                                              | 3 |
| C1R       | complement component 1, r subcomponent                             | 3 |
| C20ORF108 | chromosome 20 open reading frame 108                               | 3 |
| C7ORF30   | chromosome 7 open reading frame 30                                 | 3 |
| COL5A2    | collagen, type V, alpha 2                                          | 3 |
| COL9A3    | collagen, type IX, alpha 3                                         | 3 |
| CTHRC1    | collagen triple helix repeat containing 1                          | 3 |
| GSN       | gelsolin (amyloidosis, Finnish type)                               | 3 |
| HS6ST2    | heparan sulfate 6-O-sulfotransferase 2                             | 3 |
| ISLR      | immunoglobulin superfamily containing leucine-rich repeat          | 3 |
| JAG1      | jagged 1 (Alagille syndrome)                                       | 3 |
| LUM       | lumican                                                            | 3 |
| NID1      | nidogen 1                                                          | 3 |
| PLTP      | phospholipid transfer protein                                      | 3 |
| SFRP1     | secreted frizzled-related protein 1                                | 3 |
| SPATA6    | spermatogenesis associated 6                                       | 3 |
| TGFB2     | transforming growth factor, beta 2                                 | 3 |
| ADAMTSL2  | ADAMTS-like 2                                                      | 2 |
| AMH       | anti-Mullerian hormone                                             | 2 |
| C2ORF7    | chromosome 2 open reading frame 7                                  | 2 |
| C4BPA     | complement component 4 binding protein, alpha                      | 2 |
| CFDP1     | craniofacial development protein 1                                 | 2 |
| CMTM3     | CKLF-like MARVEL transmembrane domain containing 3                 | 2 |
| COL16A1   | collagen, type XVI, alpha 1                                        | 2 |
| COL4A5    | collagen, type IV, alpha 5                                         | 2 |
| CSPG5     | chondroitin sulfate proteoglycan 5 (neuroglycan C)                 | 2 |
| CST3      | cystatin C                                                         | 2 |
| CYR61     | cysteine-rich, angiogenic inducer, 61                              | 2 |
| EDIL3     | EGF-like repeats and discoidin I-like domains 3                    | 2 |
| F9        | coagulation factor IX                                              | 2 |
| FIGF      | c-fos induced growth factor (vascular endothelial growth factor D) | 2 |
| FRZB      | frizzled-related protein                                           | 2 |
| FUCA2     | fucosidase, alpha-L- 2, plasma                                     | 2 |
| IGFBP2    | insulin-like growth factor binding protein 2, 36kDa                | 2 |
| LOXL1     | lysyl oxidase-like 1                                               | 2 |
| METRNL    | meteorin, glial cell differentiation regulator-like                | 2 |
| NELL2     | NEL-like 2 (chicken)                                               | 2 |
| NTN1      | netrin 1                                                           | 2 |

|          |                                                                                     |   |
|----------|-------------------------------------------------------------------------------------|---|
| OPTC     | opticin                                                                             | 2 |
| PGCP     | plasma glutamate carboxypeptidase                                                   | 2 |
| PRPSAP1  | phosphoribosyl pyrophosphate synthetase-associated protein 1                        | 2 |
| SERINC2  | serine incorporator 2                                                               | 2 |
| SFRP4    | secreted frizzled-related protein 4                                                 | 2 |
| TNC      | tenascin C                                                                          | 2 |
| ADAMTS1  | ADAM metallopeptidase with thrombospondin type 1 motif, 1                           | 1 |
| ADAMTS19 | ADAM metallopeptidase with thrombospondin type 1 motif, 19                          | 1 |
| ADCYAP1  | adenylate cyclase activating polypeptide 1 (pituitary)                              | 1 |
| AGR3     | anterior gradient homolog 3 ( <i>Xenopus laevis</i> )                               | 1 |
| ANGPTL2  | angiopoietin-like 2                                                                 | 1 |
| APOOL    | apolipoprotein O-like                                                               | 1 |
| B9D1     | B9 protein domain 1                                                                 | 1 |
| BCHE     | butyrylcholinesterase                                                               | 1 |
| BGLAP    | bone gamma-carboxyglutamate (gla) protein                                           | 1 |
| BMP7     | bone morphogenetic protein 7                                                        | 1 |
| C10ORF59 | chromosome 10 open reading frame 59                                                 | 1 |
| C19ORF10 | chromosome 19 open reading frame 10                                                 | 1 |
| C1GALT1  | core 1 synthase, glycoprotein-N-acetylgalactosamine 3-beta-galactosyltransferase, 1 | 1 |
| C1ORF102 | chromosome 1 open reading frame 102                                                 | 1 |
| C1QTNF3  | C1q and tumor necrosis factor related protein 3                                     | 1 |
| C2       | complement component 2                                                              | 1 |
| C2CD2    | C2 calcium-dependent domain containing 2                                            | 1 |
| C4ORF31  | chromosome 4 open reading frame 31                                                  | 1 |
| CCL1     | chemokine (C-C motif) ligand 1                                                      | 1 |
| CHGA     | chromogranin A (parathyroid secretory protein 1)                                    | 1 |
| CILP     | cartilage intermediate layer protein, nucleotide pyrophosphohydrolase               | 1 |
| CLU      | clusterin                                                                           | 1 |
| CMTM8    | CKLF-like MARVEL transmembrane domain containing 8                                  | 1 |
| COL14A1  | collagen, type XIV, alpha 1                                                         | 1 |
| COL21A1  | collagen, type XXI, alpha 1                                                         | 1 |
| COL4A1   | collagen, type IV, alpha 1                                                          | 1 |
| COL4A2   | collagen, type IV, alpha 2                                                          | 1 |
| COL9A2   | collagen, type IX, alpha 2                                                          | 1 |
| CPD      | carboxypeptidase D                                                                  | 1 |
| CPN1     | carboxypeptidase N, polypeptide 1                                                   | 1 |
| CRISPLD2 | cysteine-rich secretory protein LCCL domain containing 2                            | 1 |
| CRTAC1   | cartilage acidic protein 1                                                          | 1 |
| CRTAP    | cartilage associated protein                                                        | 1 |
| CTGF     | connective tissue growth factor                                                     | 1 |
| CYTL1    | cytokine-like 1                                                                     | 1 |
| DDRGK1   | DDRGK domain containing 1                                                           | 1 |

|          |                                                                                                        |   |
|----------|--------------------------------------------------------------------------------------------------------|---|
| EDN3     | endothelin 3                                                                                           | 1 |
| EGFL7    | EGF-like-domain, multiple 7                                                                            | 1 |
| EMILIN2  | elastin microfibril interfacier 2                                                                      | 1 |
| EPYC     | epiphycan                                                                                              | 1 |
| F2       | coagulation factor II (thrombin)                                                                       | 1 |
| FAM172A  | family with sequence similarity 172, member A                                                          | 1 |
| FAM20B   | family with sequence similarity 20, member B                                                           | 1 |
| FAM55C   | family with sequence similarity 55, member C                                                           | 1 |
| FBN2     | fibrillin 2                                                                                            | 1 |
| FGF10    | fibroblast growth factor 10                                                                            | 1 |
| FGF19    | fibroblast growth factor 19                                                                            | 1 |
| FLJ22662 | hypothetical protein FLJ22662                                                                          | 1 |
| FSTL3    | follistatin-like 3 (secreted glycoprotein)                                                             | 1 |
| IGFBP7   | insulin-like growth factor binding protein 7                                                           | 1 |
| IGH-3    | immunoglobulin heavy chain 3 (serum IgG2b)                                                             | 1 |
| IGSF21   | immunoglobulin superfamily, member 21                                                                  | 1 |
| LECT1    | leukocyte cell derived chemotaxin 1                                                                    | 1 |
| LY86     | lymphocyte antigen 86                                                                                  | 1 |
| MATN4    | matrilin 4                                                                                             | 1 |
| MFGE8    | milk fat globule-EGF factor 8 protein                                                                  | 1 |
| MMP11    | matrix metallopeptidase 11 (stromelysin 3)                                                             | 1 |
| MMP9     | matrix metallopeptidase 9 (gelatinase B, 92kDa gelatinase, 92kDa type IV collagenase)                  | 1 |
| MST1     | macrophage stimulating 1 (hepatocyte growth factor-like)                                               | 1 |
| NENF     | neuron derived neurotrophic factor                                                                     | 1 |
| NME6     | non-metastatic cells 6, protein expressed in (nucleoside-diphosphate kinase)                           | 1 |
| OLFML2A  | olfactomedin-like 2A                                                                                   | 1 |
| OLFML2B  | olfactomedin-like 2B                                                                                   | 1 |
| PDZD11   | PDZ domain containing 11                                                                               | 1 |
| PGLYRP1  | peptidoglycan recognition protein 1                                                                    | 1 |
| PTX3     | pentraxin-related gene, rapidly induced by IL-1 beta                                                   | 1 |
| QPCT     | glutaminy-peptide cyclotransferase                                                                     | 1 |
| SCYE1    | small inducible cytokine subfamily E, member 1 (endothelial monocyte-activating)                       | 1 |
| SEPP1    | selenoprotein P, plasma, 1                                                                             | 1 |
| SERPINF2 | serpin peptidase inhibitor, clade F (alpha-2 antiplasmin, pigment epithelium derived factor), member 2 | 1 |
| SLIT1    | slit homolog 1 (Drosophila)                                                                            | 1 |
| SMOC2    | SPARC related modular calcium binding 2                                                                | 1 |
| TAGLN3   | transgelin 3                                                                                           | 1 |
| TGFBI    | transforming growth factor, beta-induced, 68kDa                                                        | 1 |
| THBS1    | thrombospondin 1                                                                                       | 1 |
| THBS4    | thrombospondin 4                                                                                       | 1 |

|         |                                                                               |   |
|---------|-------------------------------------------------------------------------------|---|
| TIMP2   | TIMP metalloproteinase inhibitor 2                                            | 1 |
| TM2D2   | TM2 domain containing 2                                                       | 1 |
| TM2D3   | TM2 domain containing 3                                                       | 1 |
| TOR2A   | torsin family 2, member A                                                     | 1 |
| TWSG1   | twisted gastrulation homolog 1 (Drosophila)                                   | 1 |
| VCAN    | versican                                                                      | 1 |
| VEGFA   | vascular endothelial growth factor A                                          | 1 |
| VWA5B1  | von Willebrand factor A domain containing 5B1                                 | 1 |
| WFIKKN1 | WAP, follistatin/kazal, immunoglobulin, kunitz and netrin domain containing 1 | 1 |
| WNT3    | wingless-type MMTV integration site family, member 3                          | 1 |
| WNT5A   | wingless-type MMTV integration site family, member 5A                         | 1 |
